# Supplementary material for: Rheological properties and crystallization behavior of comb-like graft poly(l-lactide): influences of graft length and graft density
Source: Royal Society of Chemistry journal article supplement (doi:10.1039/c6ra02697d), 2016-01-01
Supplement: c6ra02697d1.pdf [file c6ra02697d1.pdf]

# SUPPORTING INFORMATION

## Rheological Property and Crystallization Behavior of Comb-like Graft Poly(L-lactide): Influences of Graft Length and Graft Density

Xuefei Leng, Zhiyong Wei, Yufei Bian, Yingying Ren, Yurong Wang, Qinyi Wang, Yang Li\*

State Key Laboratory of Fine Chemicals, Department of Polymer Science and Engineering, School of Chemical Engineering, Dalian University of Technology, Dalian 116024, Liaoning, China

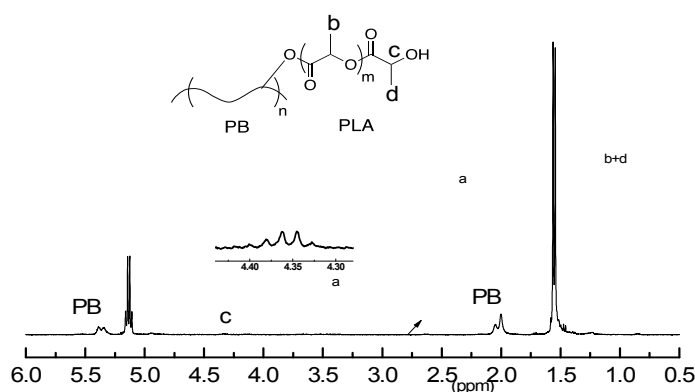

**Figure S1.**  $^1\text{H}$  NMR spectra of comb-like graft PLLA.

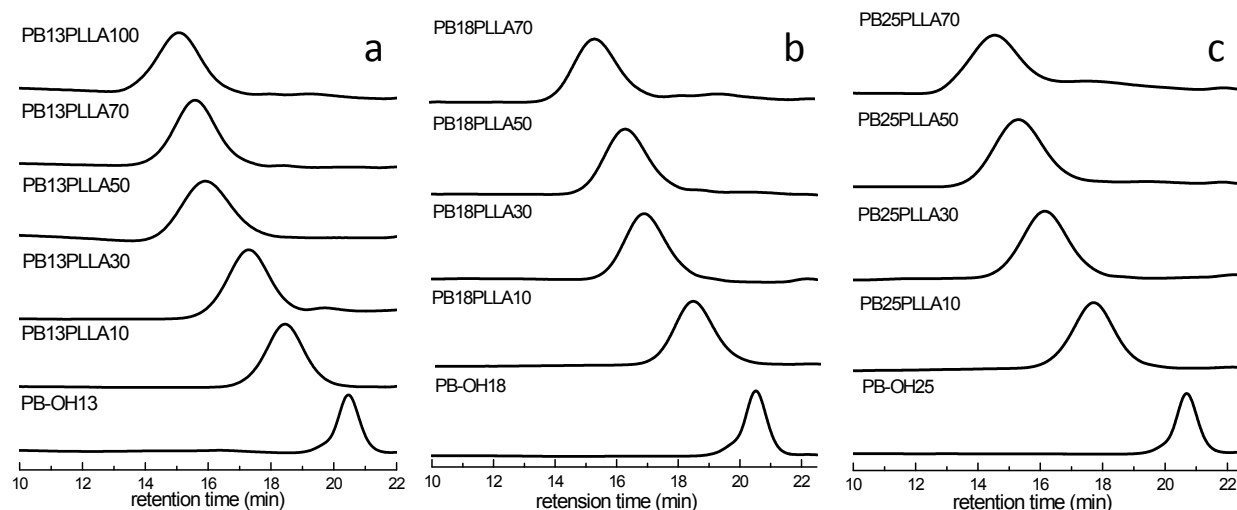

**Figure S2.** GPC spectrum of comb-like graft PLLA: (a) PB13PLLA, initiated by PB-OH13; (b) PB18PLLA, initiated by PB-OH18; (c) PB25PLLA, initiated by PB-OH25.

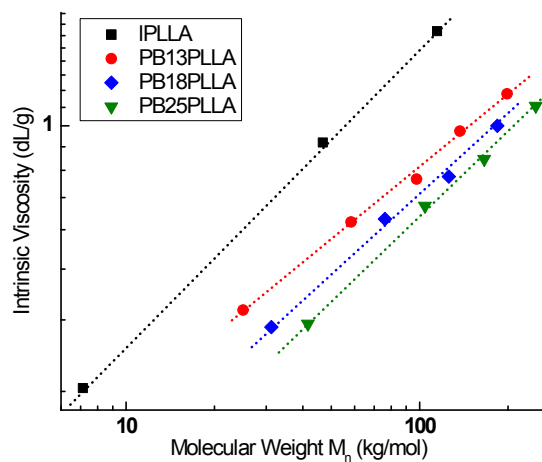

**Figure S3.** Intrinsic viscosities versus molecular weight of the linear PLLA (IPLLA) and graft PLLA (PB13PLLA, PB18PLLA and PB25PLLA).

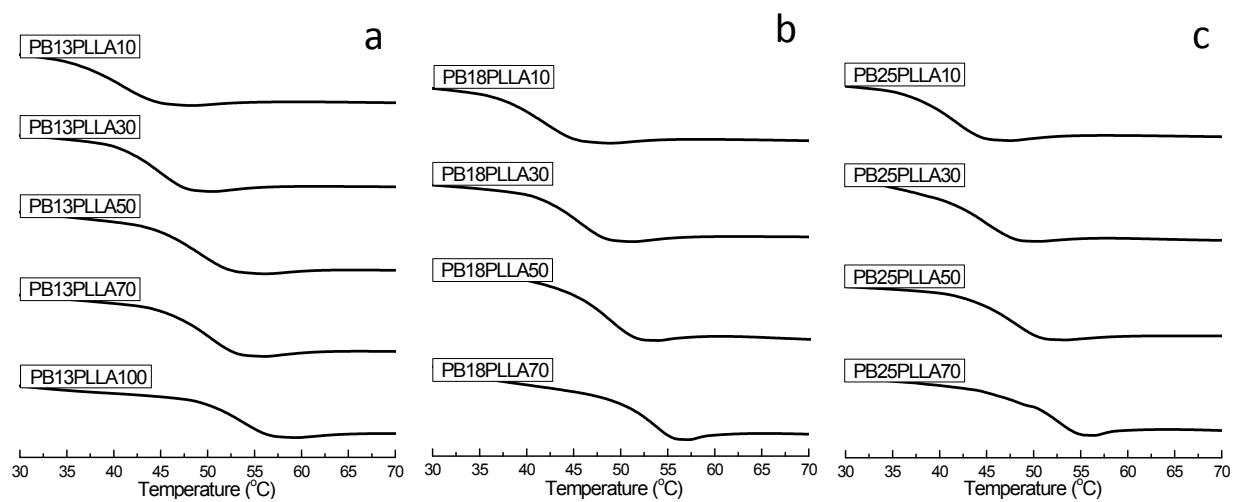

**Figure S4.** DSC curves of comb-like PLLA: (a) PB13PLLA; (b) PB18PLLA; (c) PB25PLLA.
